# Supplementary material for: The Pt/g-C3N4-CNS catalyst via in situ synthesis process with excellent performance for methanol electrocatalytic oxidation reaction
Source: Royal Society of Chemistry journal article supplement (doi:10.1039/d1nj05858d), 2022-01-01
Supplement: d1nj05858d1.pdf [file d1nj05858d1.pdf]

## Supplementary Information

### **The Pt/g-C<sub>3</sub>N<sub>4</sub>-CNS catalyst via in-situ synthesis process with excellent performance for methanol electrocatalytic oxidation reaction**

Xiaolong Liang<sup>a,b</sup>, Fang Dong<sup>a</sup>, Zhicheng Tang<sup>a\*</sup>, Qingchun Wang<sup>b\*</sup>

*(<sup>a</sup> State Key Laboratory for Oxo Synthesis and Selective Oxidation, and National  
Engineering Research Center for Fine Petrochemical Intermediates, Lanzhou  
Institute of Chemical Physics, Chinese Academy of Sciences, Lanzhou, 730000, China*

*<sup>b</sup> College of materials and metallurgical engineering, Inner Mongolia university of  
science and technology, Baotou 014010, China)*

*\*Corresponding author:*

Tel.: +86-931-4968083, Fax: +86-931-4968019, E-mail address:  
tangzhicheng@licp.cas.cn (Z. Tang).

*\*\*Corresponding author:*

Tel.: +86-15184792170, Fax: +86-0472-5955961, E-mail address:  
qingchun0221@126.com

### **Preparation of carbon nanosheets:**

The anhydrous sodium carbonate powder is used as the hard template, and the carbon nanosheets are prepared by the chemical vapor deposition method. First, the  $\text{Na}_2\text{CO}_3$  powder is put into a ceramic boat, and the boat is placed in a tube furnace. The Ar was then passed into the tube furnace. The heating furnace is heated to  $700\text{ }^\circ\text{C}$  at a heating rate of  $10\text{ }^\circ\text{C}/\text{min}$ . Hydrogen ( $\text{H}_2$ ) and acetylene ( $\text{C}_2\text{H}_2$ ) with a flow ratio of 5:1 are introduced into the furnace to deposit carbon nanosheets. The deposition reaction was maintained for 40 minutes, and then the furnace was naturally cooled to room temperature in an Ar- $\text{H}_2$  environment. The deposited product was washed with deionized water. Finally, powdered carbon nanosheets were obtained by drying the product at  $80\text{ }^\circ\text{C}$  for 24 hours.

### **Activity calculation process**

Specific activity ( $\text{mA}/\text{cm}^2$ ) values were calculated from the effective area of the electrode ( $\text{cm}^2$ ) and the measured current  $I$  ( $\text{mA}$ ) :

$$\text{Specific activity} = \text{current density} = I/V$$

Mass activity ( $\text{mA}/\text{mg}_{\text{Pt}}$ ) values were calculated from the electrocatalyst loading  $m$  ( $\text{mg}$ ) and the measured current density  $j$  ( $\text{mA}/\text{cm}^2$ ) :

$$\text{Mass activity} = j/m$$

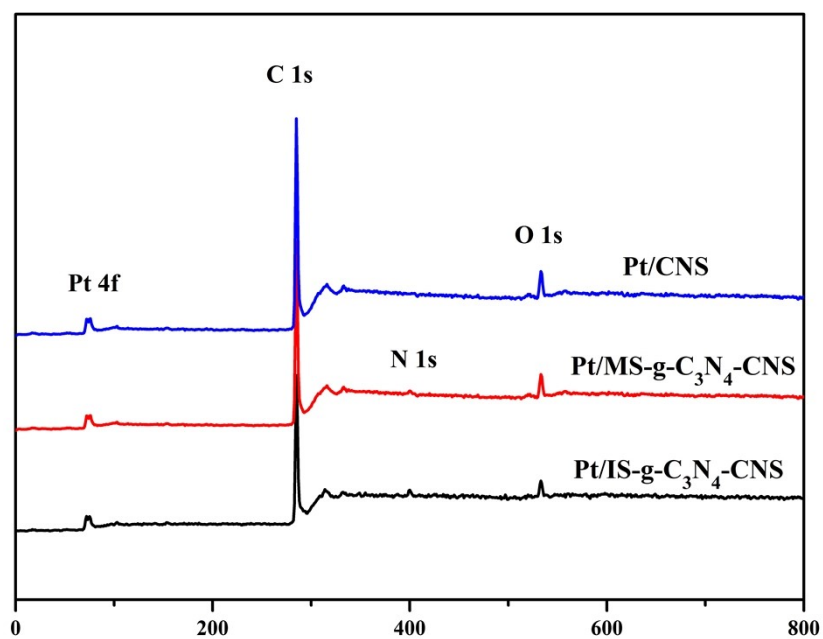

**Fig. S1** XPS survey spectra of Pt/IS-g-C<sub>3</sub>N<sub>4</sub>-CNS, Pt/MS-g-C<sub>3</sub>N<sub>4</sub>-CNS and Pt/CNS.

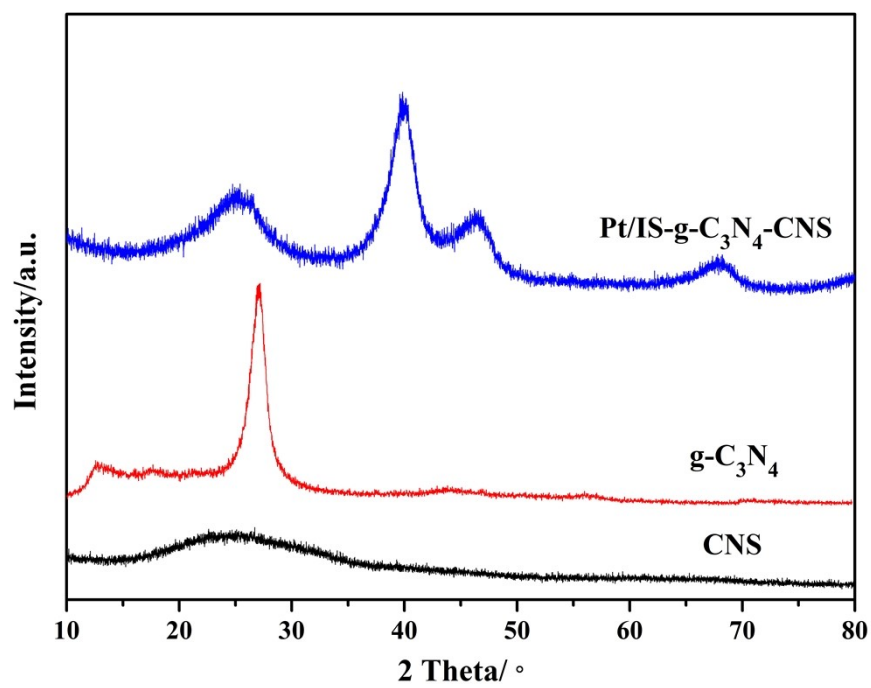

**Fig.S2** The XRD patterns of Pt/IS-g-C<sub>3</sub>N<sub>4</sub>-CNS, g-C<sub>3</sub>N<sub>4</sub> and CNS.

**Table S1** XPS elemental analysis of Pt/g-C<sub>3</sub>N<sub>4</sub>-CNS samples.

| Samples                                    | C at.% | N at.% | O at.% | Pt at.% |
|--------------------------------------------|--------|--------|--------|---------|
| Pt/IS-g-C <sub>3</sub> N <sub>4</sub> -CNS | 90.09  | 3.57   | 5.31   | 1.02    |
| Pt/MS-g-C <sub>3</sub> N <sub>4</sub> -CNS | 90.36  | 2.89   | 5.62   | 1.13    |
| Pt/CNS                                     | 93.18  | --     | 5.58   | 1.24    |
